# Supplementary material for: Incidence of Hypertension Among US Hispanics/Latinos: The Hispanic Community Health Study/Study of Latinos, 2008 to 2017
Source: PubMed Central journal article supplement — J Am Heart Assoc. 2020 Jun 1;9(12):e015031. doi: 10.1161/JAHA.119.015031 (PMC7429033; doi:10.1161/jaha.119.015031), 2020-06-01
Supplement: JAH3-9-e015031-s001.pdf [file JAH3-9-e015031-s001.pdf]

# **SUPPLEMENTAL MATERIAL**

**Table S1. Incidence of JNC7 defined hypertension among US Hispanic/Latino men and women in the HCHS/SOL target population.**

|                              | Men<br>(unweighted n=2,878)        |            |                                  |        |                         |            | Women<br>(unweighted n=4,852)      |            |                                  |        |                         |            |
|------------------------------|------------------------------------|------------|----------------------------------|--------|-------------------------|------------|------------------------------------|------------|----------------------------------|--------|-------------------------|------------|
|                              | Cumulative Incidence<br>(six-year) |            | Incidence Rate<br>(per 1,000 PY) |        | Incidence Rate<br>Ratio |            | Cumulative Incidence<br>(six-year) |            | Incidence Rate<br>(per 1,000 PY) |        | Incidence Rate<br>Ratio |            |
|                              |                                    |            | 95%                              |        |                         |            |                                    |            | 95%                              |        |                         |            |
|                              | CI                                 | 95% CL     | IR                               | CL     | IRR                     | 95% CL     | CI                                 | 95% CL     | IR                               | CL     | IRR                     | 95% CL     |
| Overall                      | 13.9                               | 12.4, 15.5 | 24                               | 22, 27 | -                       | -          | 12.8                               | 11.7, 14.0 | 23                               | 21, 25 | -                       | -          |
| Hispanic/Latino background** |                                    |            |                                  |        |                         |            |                                    |            |                                  |        |                         |            |
| Mexican (ref)                | 11.8                               | 9.6, 14.5  | 20                               | 16, 25 | 1.00                    | -          | 10.2                               | 8.7, 11.8  | 18                               | 16, 21 | 1.00                    | -          |
| Central American             | 10.8                               | 8.0, 14.3  | 18                               | 13, 25 | 0.89                    | 0.61, 1.30 | 12.7                               | 10.3, 15.5 | 24                               | 19, 29 | 1.30*                   | 1.01, 1.68 |
| Cuban                        | 15.6                               | 12.1, 20.0 | 29*                              | 24, 35 | 1.43*                   | 1.09, 1.88 | 14.3*                              | 11.2, 18.0 | 27*                              | 23, 33 | 1.50*                   | 1.17, 1.92 |
| Dominican                    | 17.7                               | 12.9, 23.7 | 30                               | 22, 42 | 1.50*                   | 1.03, 2.20 | 13.5                               | 10.8, 16.9 | 25                               | 19, 31 | 1.35*                   | 1.01, 1.81 |
| Puerto Rican                 | 15.0                               | 11.3, 19.6 | 25                               | 19, 33 | 1.24                    | 0.89, 1.72 | 19.6*                              | 15.5, 24.5 | 33*                              | 27, 40 | 1.80*                   | 1.40, 2.30 |
| South American               | 8.9                                | 5.6, 13.7  | 15                               | 10, 23 | 0.74                    | 0.45, 1.20 | 9.8                                | 7.0, 13.5  | 21                               | 16, 27 | 1.14                    | 0.83, 1.57 |
| Mixed/Other                  | 20.1                               | 12.8, 30.0 | 38                               | 23, 64 | 1.88*                   | 1.06, 3.35 | 18.4*                              | 12.2, 26.8 | 34*                              | 22, 52 | 1.85*                   | 1.16, 2.95 |

CI: cumulative incidence; CL: confidence limit; HCHS/SOL: Hispanic Community Health Study/Study of Latinos; IR: Incidence rate; IRR:

Incidence rate ratio; JNC7: Seventh Report of the Joint National Committee on Prevention, Detection, Evaluation and Treatment of High Blood Pressure; US: United States

All data are age standardized (CIs) or age adjusted (IRs and IRRs) to the baseline age distribution

JNC7 defined hypertension: self-reported medication use, systolic blood pressure  $\geq 140$  mmHg, or diastolic blood pressure  $\geq 90$  mmHg.

\*\* Incidence of hypertension differs significantly by Hispanic/Latino background group for both men and women, omnibus test  $p < 0.01$ .

\*Estimate is significantly different from Mexican Americans (the reference group).
